# Supplementary material for: Correlations of the physicochemical properties of organosolv lignins from Broussonetia papyrifera with their antioxidant activities
Source: Royal Society of Chemistry journal article supplement (doi:10.1039/d0se00940g), 2020-01-01
Supplement: d0se00940g1.pdf [file d0se00940g1.pdf]

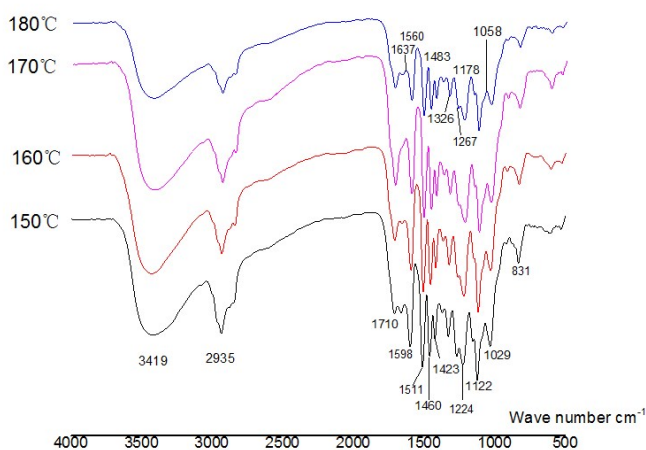

**Figure S1.** FT-IR spectra of lignin fractions

**Table S1.** Assignments and relative intensities of important signal from lignin fractions

| Assignment                                    | Wavenumber       | L <sub>150</sub> | L <sub>160</sub> | L <sub>170</sub> | L <sub>180</sub> |
|-----------------------------------------------|------------------|------------------|------------------|------------------|------------------|
|                                               | cm <sup>-1</sup> |                  |                  |                  |                  |
| Stretching vibration of -OH                   | 3400             | 0.82             | 0.84             | 0.89             | 0.87             |
| Vibration of C-H in methyl and Methylene      | 2930             | 0.81             | 0.80             | 0.77             | 0.83             |
| Stretching vibration of non-conjugate C=O     | 1715             | 0.70             | 0.74             | 0.69             | 0.83             |
| Aromatic skeleton                             | 1600             | 0.88             | 0.86             | 0.87             | 0.89             |
|                                               | 1512             | 1.0              | 1.0              | 1.0              | 1.0              |
| Deformation vibration of C-H                  | 1423             | 0.85             | 0.84             | 0.86             | 0.9              |
|                                               | 1460             | 0.94             | 0.94             | 0.96             | 0.97             |
| Syringyl                                      | 1326             | 0.83             | 0.81             | 0.84             | 0.89             |
| C-O of Guaiacyl                               | 1268             | 0.94             | 0.93             | 0.91             | 0.95             |
| Aromatic methyl ether linkage                 | 1223             | 0.99             | 1.04             | 1.03             | 1.03             |
| Deformation vibration of C-H in syringyl      | 1122             | 0.99             | 1.14             | 1.13             | 1.08             |
| C-H in aromatic ring of Guaiacyl and syringyl | 1030             | 0.88             | 0.89             | 0.86             | 0.92             |
| Aromatic C-H deformation out of plane         | 831              | 0.41             | 0.38             | 0.35             | 0.44             |

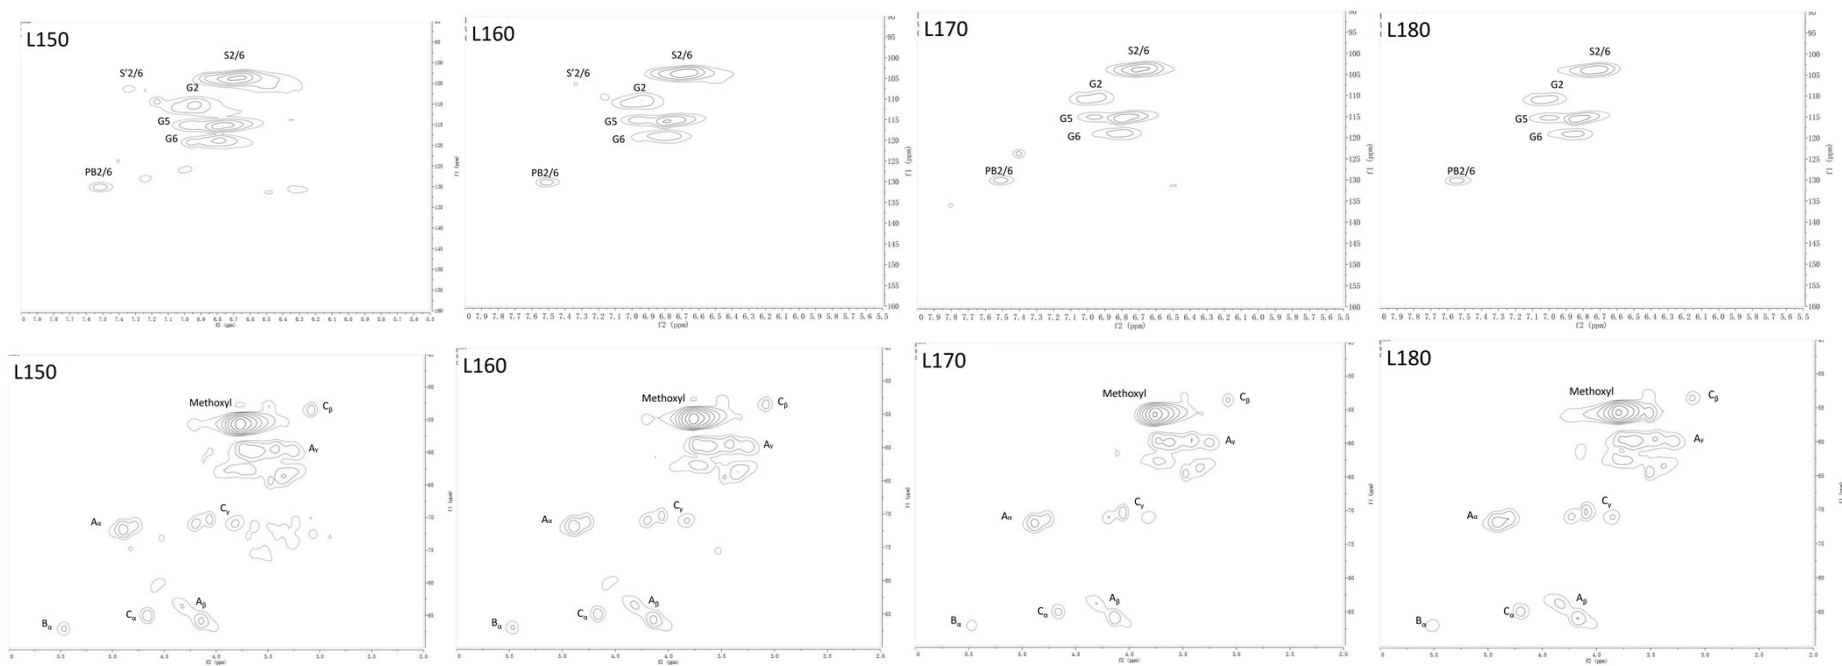

Figure S2. Aromatic regions and aliphatic regions in HSQC spectra of the isolated lignin samples from *Broussonetia papyrifera*: (A)  $\beta$ -O-4 alkyl-aryl ethers; (B) phenylcoumarane; (C) resinols; (PB) p-hydroxybenzoate substructures; (G) guaiacyl units; (S) syringyl unit; (S') oxidized syringyl units with a C $\alpha$  ketone.
